# Supplementary material for: Sweetened Beverage Intake and Incident Chronic Kidney Disease in the UK Biobank Study
Source: PubMed Central journal article supplement (PMC10902724; doi:10.1001/jamanetworkopen.2023.56885), 2024-02-28
Supplement: jamanetwopen-e2356885-s002.pdf [file jamanetwopen-e2356885-s002.pdf]

## Data Sharing Statement

Heo. Sweetened Beverage Intake and Incident Chronic Kidney Disease in the UK Biobank Study. *JAMA Netw Open*. Published February 28, 2024.

doi:10.1001/jamanetworkopen.2023.56885

### Data

**Data available:** No

### Additional Information

**Explanation for why data not available:** Researchers can use UK Biobank resources to access the data used in this study. UK Biobank Data will be made available on the UK Biobank Consortium website.
